The author is greatly indebted to her colleagues in the Division of Anesthesiology and in the Division of Neurology in the School of Medicine for collaboration in this research.

# References

1. Brazier, M. A. B., and Finesinger, J. E.: Action of barbiturates on the cerebral cortex: Electroencephalographic studies, *Arch. Neurol. Psychiat.* 53: 51, 1945.
2. Fuster, B., Gibbs, E. L., and Gibbs, F. A.: Pentothal sleep as an aid in the diagnosis and localization of seizure discharges of the psychomotor type, *Dis. Nerv. Syst.* 9: 199, 1948.
3. Heuyer, G., Rémond, A., and Delarue, R.: L'activation de l'EEG par le pentothal, *Rev. Neurol.* 80: 642, 1949.
4. Brazier, M. A. B., Hamlin, H., Delgado, J. M. R., and Chapman, W. P.: The persistence of electroencephalogram effects of pentothal, *ANESTHESIOLOGY* 17: 95, 1956.
5. Alema, G., and Sinisi, L.: Il comportamento EEG dei soggetti affetti da tumor cerebri durante la narcosi da tiobarbiturici, *Arch. Psicol. Neurol. Psychiat.* 11: 390, 1950.
6. Pampiglione, G.: Induced fast activity in the EEG as an aid in the location of cerebral lesions, *Electroenceph. Clin. Neurophysiol.* 4: 79, 1952.
7. Goldensohn, E. S., and Purpura, D. P.: Intracellular potentials of cortical neurons during epileptogenic discharges, *Science* 139: 846, 1963.
8. Matsumoto, H., and Ajmone Marsan, C.: Cortical cellular phenomena in experimental epilepsy: Interictal manifestations, *Exp. Neurol.* 9: 286, 1964.
9. Prince, D. A., and Futamachi, K. J.: Intracellular recordings in chronic focal epilepsy, *Brain Research* 11: 681, 1968.
10. Chalazonitis, N.: Selective actions of volatile anesthetics on synaptic transmission and autorhythmicity in single identifiable neurons, *ANESTHESIOLOGY* 28: 111, 1967.
11. Somjen, G. C., and Gill, M.: The mechanism of the blockade of synaptic transmission in the mammalian spinal cord by diethyl ether and by thiopental, *J. Pharmacol. Exp. Ther.* 140: 19, 1963.
12. Grant, L. D., and Jarrard, L. E.: Functional dissociation within hippocampus, *Brain Research* 10: 392, 1968.
13. Elul, R.: Regional differences in the hippocampus of the cat. *Electroenceph. Clin. Neurophysiol.* 16: 470 and 489, 1964.
14. Brazier, M. A. B.: Studies of the EEG activity of limbic structures in man, *Electroenceph. Clin. Neurophysiol.* 25: 309, 1968.

## Obstetrics and Pediatrics

**PARACERVICAL BLOCK** Paracervical block was performed in 15 mothers in labor and maternal and fetal mepivacaine concentrations were determined. Blood was obtained from the maternal vein, fetal scalp during labor, and umbilical vessels at birth. Fetal blood also was analyzed for acid-base parameters. Mepivacaine levels averaged 8.5  $\mu\text{g/ml}$  in the mothers and 7.4  $\mu\text{g/ml}$  in the fetuses. Fetal blood levels were consistently lower than maternal levels. All but one infant had Apgar scores of 8 or 9. Fetal bradycardia was encountered in three cases; two episodes were transient and associated with Apgar scores of 8, and in the third, bradycardia persisted until delivery and was associated with a score of 4. The only significant pH variation was in the infant with persistent bradycardia. The highest mepivacaine concentrations were found in the three cases with fetal bradycardia. It is probable that a normal fetus can tolerate clinically-induced levels of mepivacaine, but that infants depressed by acidosis may be compromised. Fetal bradycardia as a result of drug toxicity should be distinguished from that due to fetal asphyxia. Paracervical block is contraindicated when placental insufficiency is anticipated. (*Gordon, H. R.: Fetal Bradycardia After Paracervical Block, New Eng. J. Med.* 279: 910 (Oct.) 1968.)

**ABSTRACTER'S COMMENT:** Drs. Sol Shnider and associates, in the correspondence section of the same journal, report significantly higher fetal mepivacaine levels in infants that had bradycardia than those that did not. Furthermore, mepivacaine levels in the infants with bradycardia exceeded maternal levels, indicating the drug found its way directly from paracervical tissue to the intervillous space. Objective data such as these will help decide the usefulness of paracervical block with mepivacaine.
